# Supplementary material for: Pacsin 2-dependent N-cadherin internalization regulates the migration behaviour of malignant cancer cells
Source: Oxford University Press journal article supplement (doi:10.1242/jcs.260827), 2023-05-03
Supplement: jcs260827supp.pdf [file jcs260827supp.pdf]

Fig. S1 Wint et al.

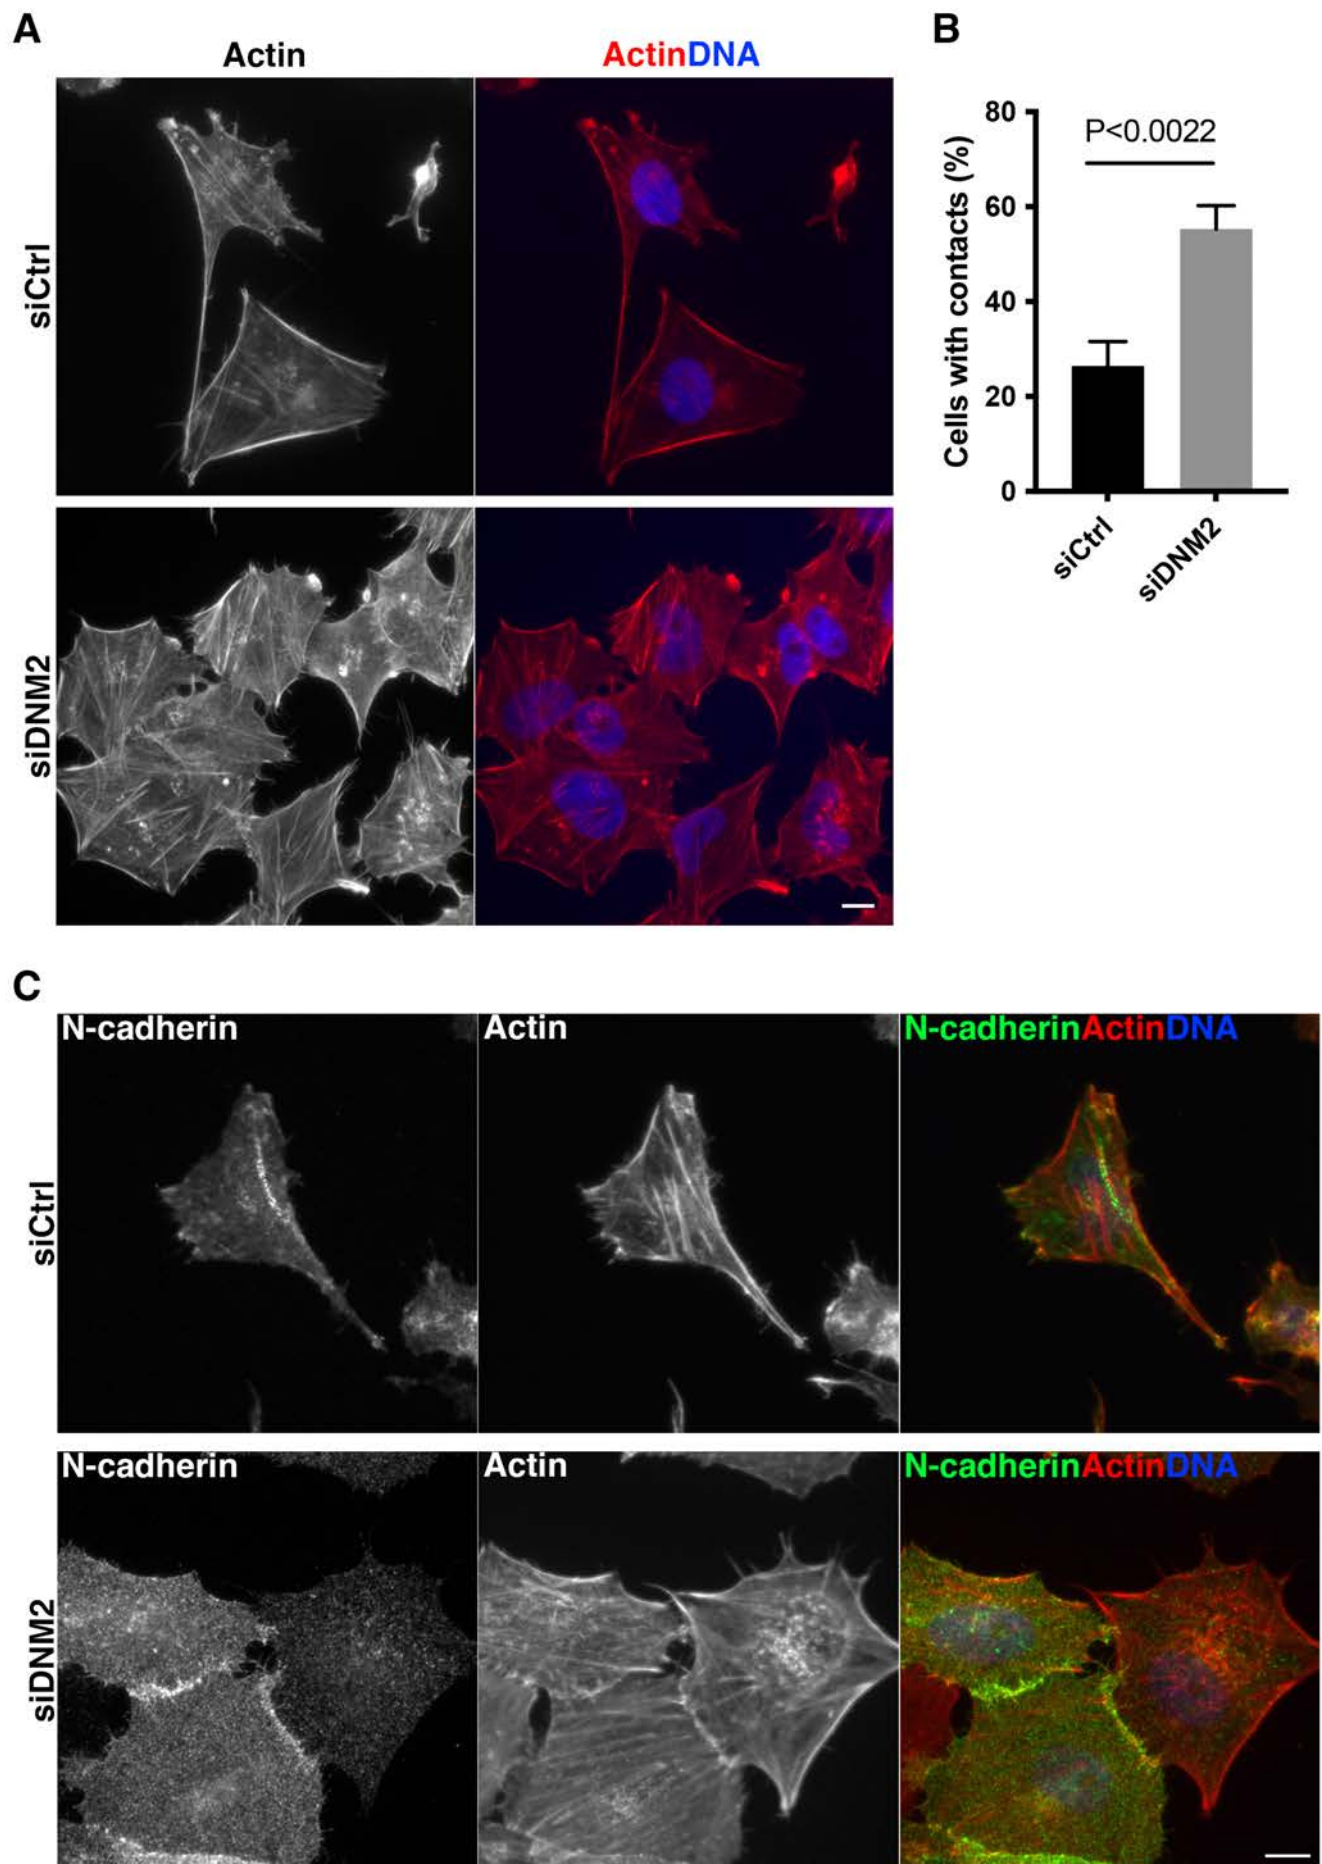

**Fig. S1. Depletion of dynamin 2 induces N-cadherin-rich bridges between contacting cells.** (A) Immunofluorescence micrographs of F-actin (red) and its merged images with DNA (blue) in control RNAi (siCtrl) or dynamin 2 RNAi (siDNM2) cells. The scale bar is 10  $\mu$ m. (B) Quantitation of the relative number of cells with cell-cell contacts for control RNAi cells (siCtrl) or dynamin 2 RNAi cells (siDNM2). Data are means  $\pm$  SD ( $n \geq 130$  cells,  $N=3$ ) (C) Immunofluorescence micrographs of control RNAi cells (siCtrl) or dynamin 2 RNAi cells (siDNM2) stained for endogenous N-cadherin (green), F-actin (red) and their merged images with DNA (blue). The scale bar is 10  $\mu$ m.

## Fig.S2 Wint et al.

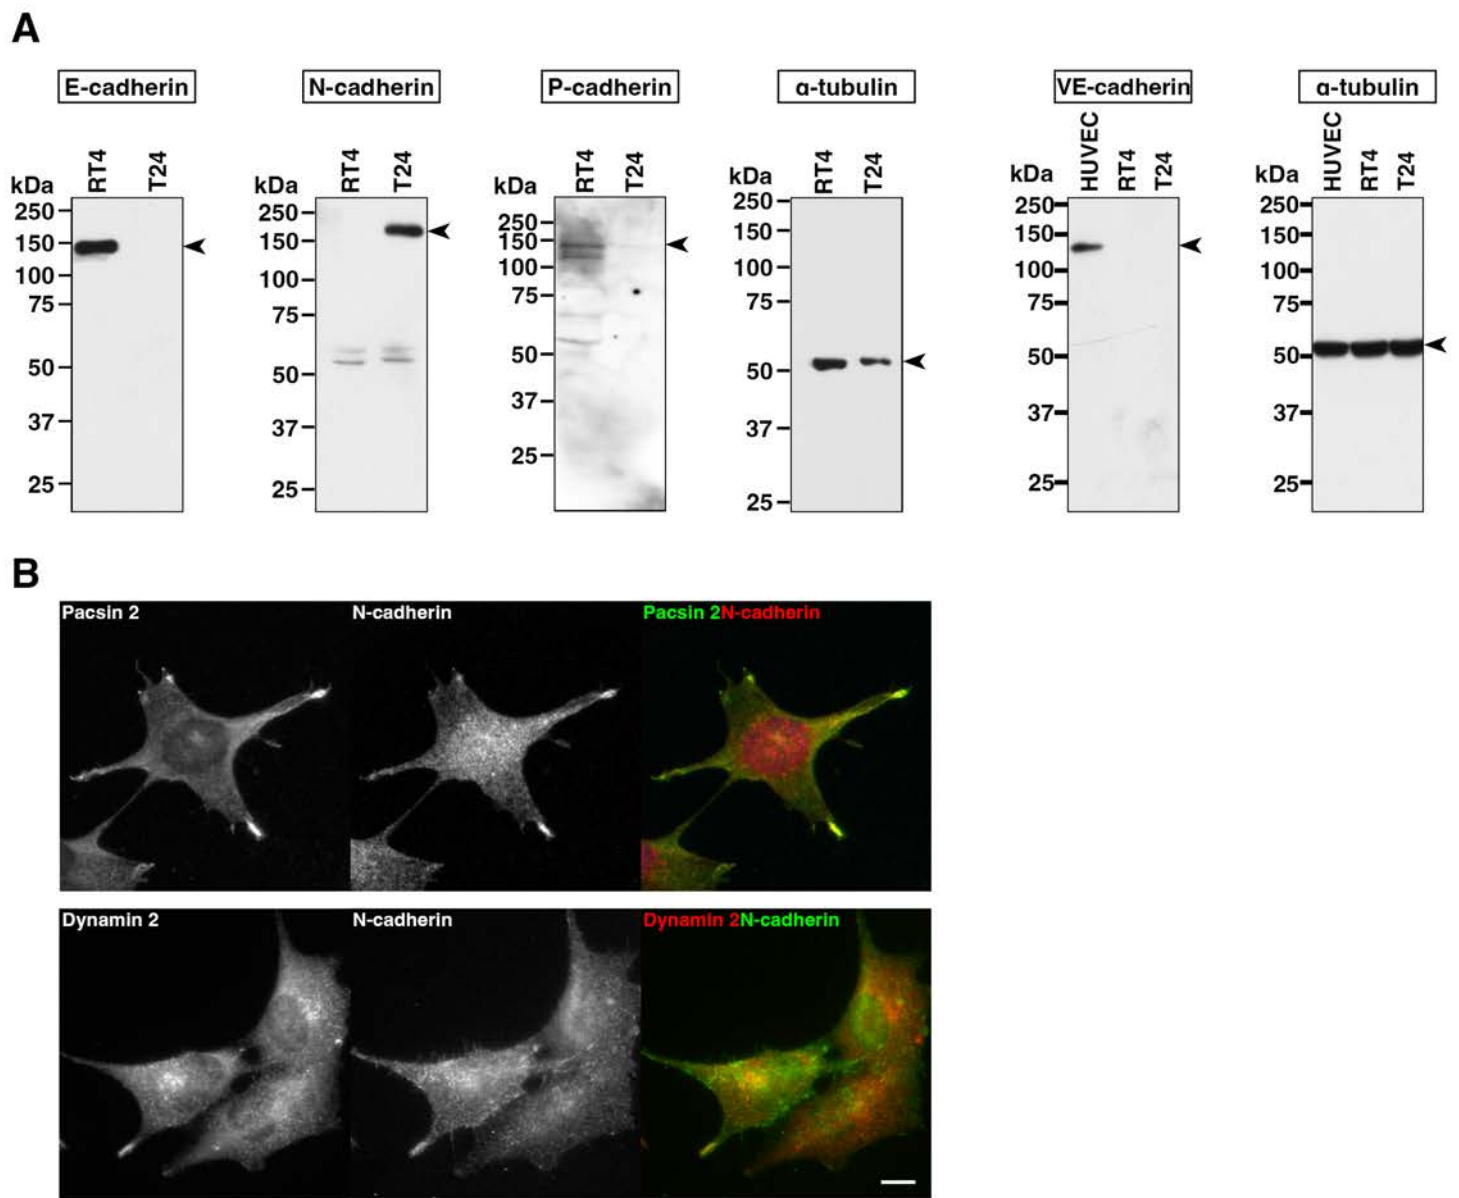

**Fig. S2. N-cadherin colocalizes with pacsin 2 and dynamin 2 at the cell periphery in T24 cells.** (A) Immunoblot analysis of endogenous E-, N- and P-cadherins in RT4 or T24 cells, and VE-cadherin in RT4, T24 or HUVEC cells together with an internal control ( $\alpha$ -tubulin). (B) Immunofluorescence micrographs of endogenous pacsin 2 (green) with endogenous N-cadherin (red) and their merged images (upper panel) or endogenous N-cadherin (green), endogenous dynamin 2 (red) and their merged images (lower panel). The scale bar is 10  $\mu$ m.

**Fig.S3 Wint et al.**

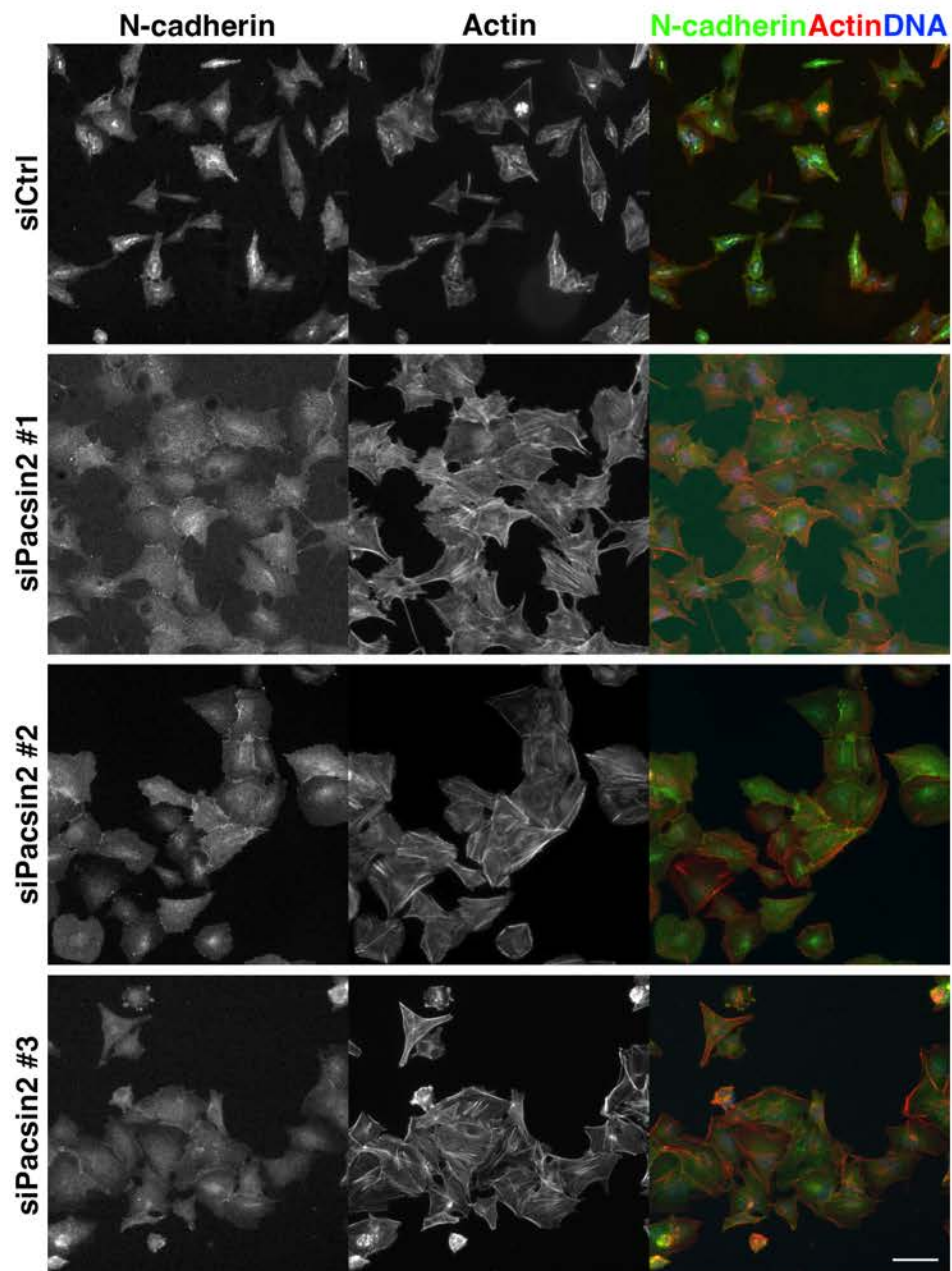

**Fig. S3. Induction of cell-cell contacts by pacsin 2 RNAi in T24 cells.** Low magnification images of N-cadherin (N-cadherin), F-actin (actin) and their merged images with DNA. The scale bar is 50  $\mu\text{m}$ .



## Fig.S4 Wint et al

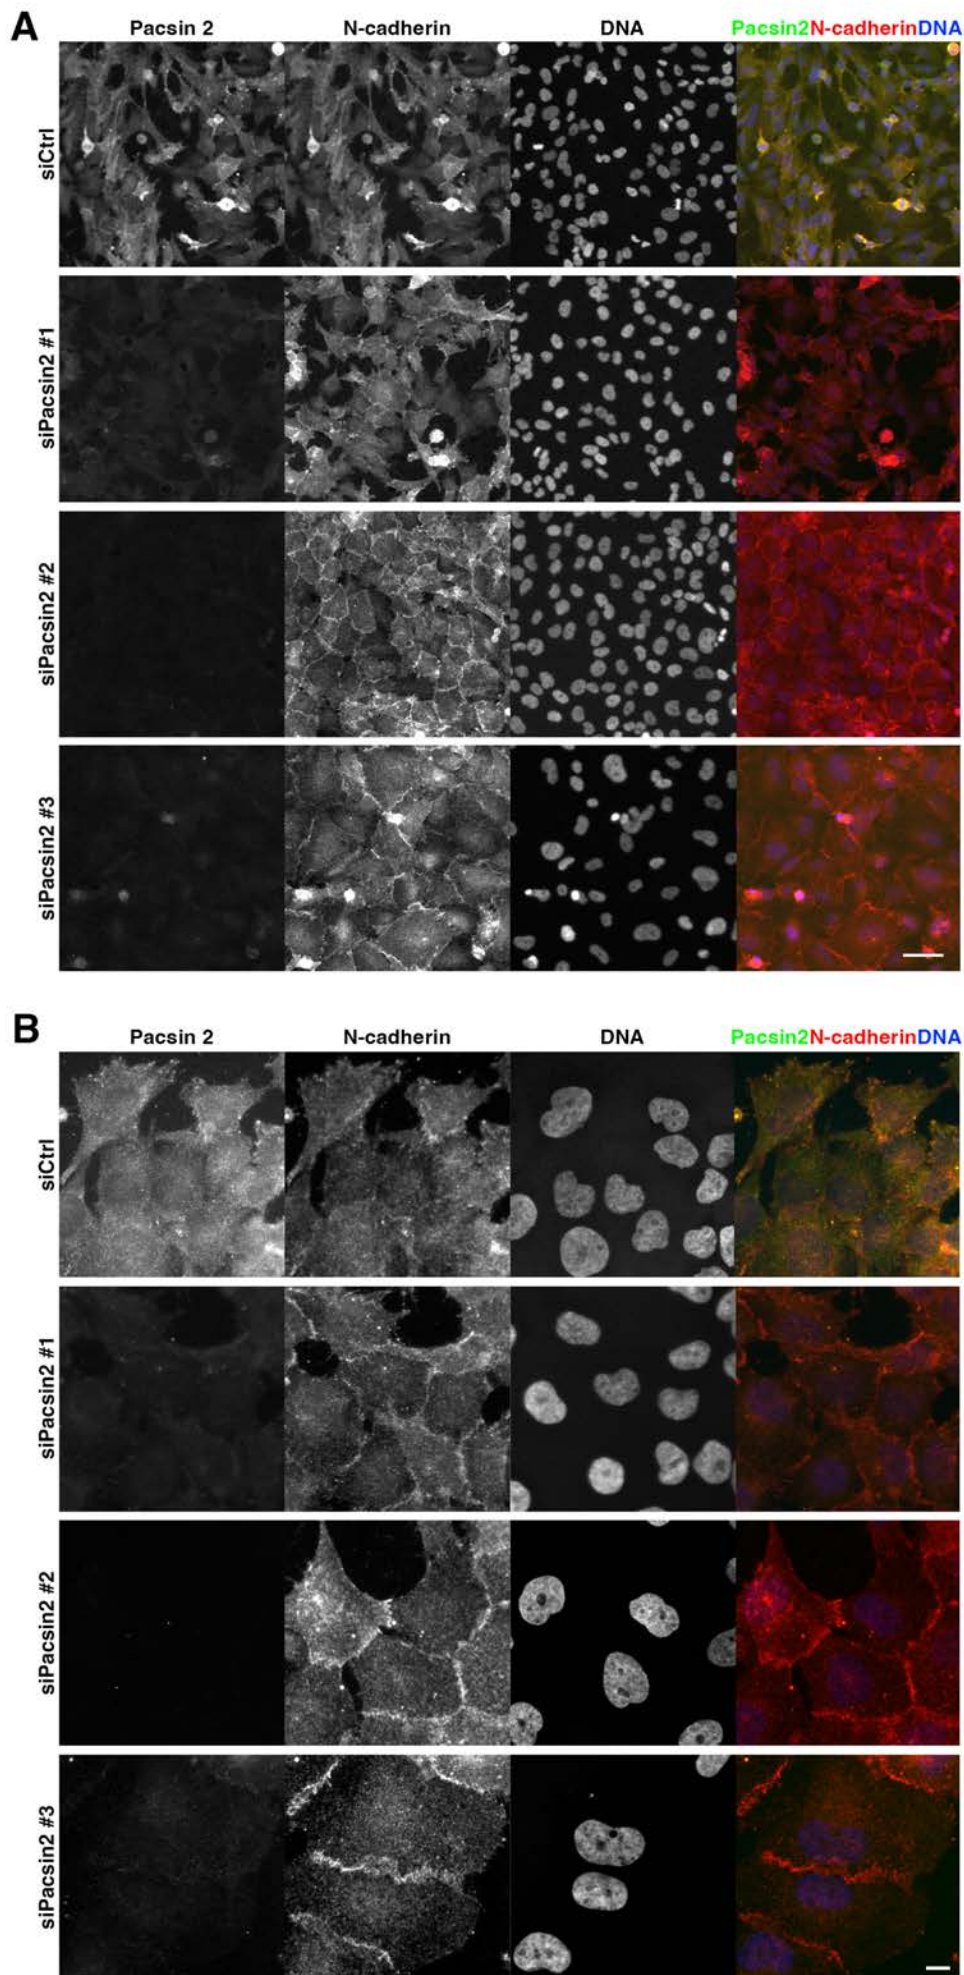

**Fig. S4 N-cadherin accumulation is induced by the depletion of pacsin 2 in T24 cells.** (A) Low and (B) high magnification immunofluorescence images of pacsin 2, N-cadherin, DNA and their merged images in control RNAi cells (siCtrl) and pacsin 2 RNAi cells (siPacsin2 #1, #2 and 3) in a densely plated condition. Scale bars are 50  $\mu\text{m}$  (A) and 10  $\mu\text{m}$  (B).

Fig. S5 Wint et al.

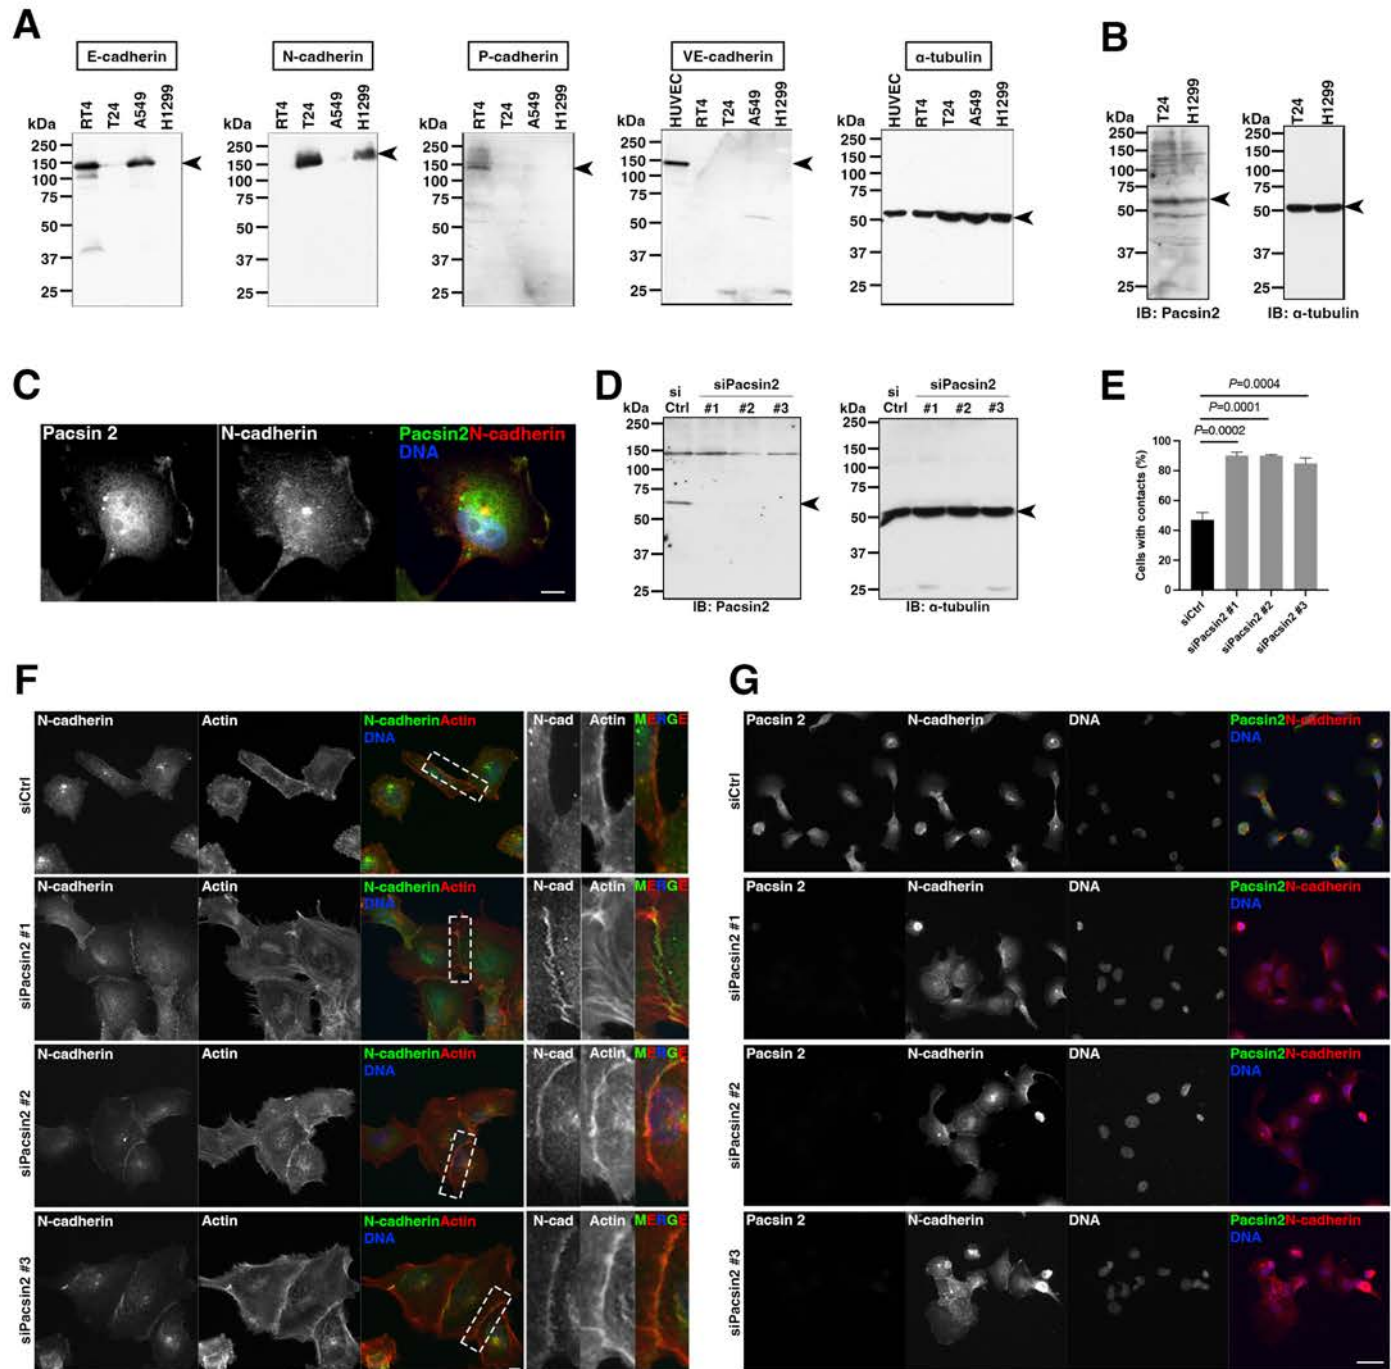

**Fig. S5. Depletion of pacsin 2 induces N-cadherin-rich cell junctions in H1299 cells.** (A) Expression profiles of cadherin isoforms in A549 and H1299 cells in comparison to RT4, T24 or HUVEC cells. (B) Expression of pacsin 2 in H1299 cells. Immunoblot analysis of pacsin 2 in H1299 cells in comparison to T24 is shown together with an internal control ( $\alpha$ -tubulin). (C) Immunofluorescence micrographs stained for pacsin 2 (green), N-cadherin (red) and their merged images with DNA (blue) in H1299 cells. The scale bar is 10  $\mu$ m. (D) Immunoblot analysis of cell extract from control RNAi cells (siCtrl) or pacsin 2 RNAi cells (siPacsin 2 #1, #2 and #3) using antibodies against pacsin 2 (IB: Pacsin 2) or tubulin as an internal control (IB: tubulin). (E) Depletion of pacsin 2 induces cell-cell contacts in H1299 cells. Quantitation of cells with cell contacts in control RNAi cells (siCtrl) or pacsin 2 RNAi cells (siPacsin 2 #1, #2 and #3). Data are means  $\pm$  SD ( $n \geq 229$  cells,  $N=3$ ). (F) Immunofluorescence micrographs of control RNAi cells (siCtrl) and pacsin 2 RNAi cells (siPacsin 2 #1, #2 and #3) stained for endogenous N-cadherin (green), F-actin (red) and their merged images with DNA (blue). Enlarged images show either the cell periphery in control cells or N-cadherin-rich cell-cell contact sites in pacsin 2 RNAi cells (shown in the dashed rectangle). Scale bars are 10  $\mu$ m. (G) Low magnification images of pacsin 2 (green), N-cadherin (red) and their merged images with DNA (blue). The scale bar is 50  $\mu$ m.



**Fig. S6 Wint et al.**

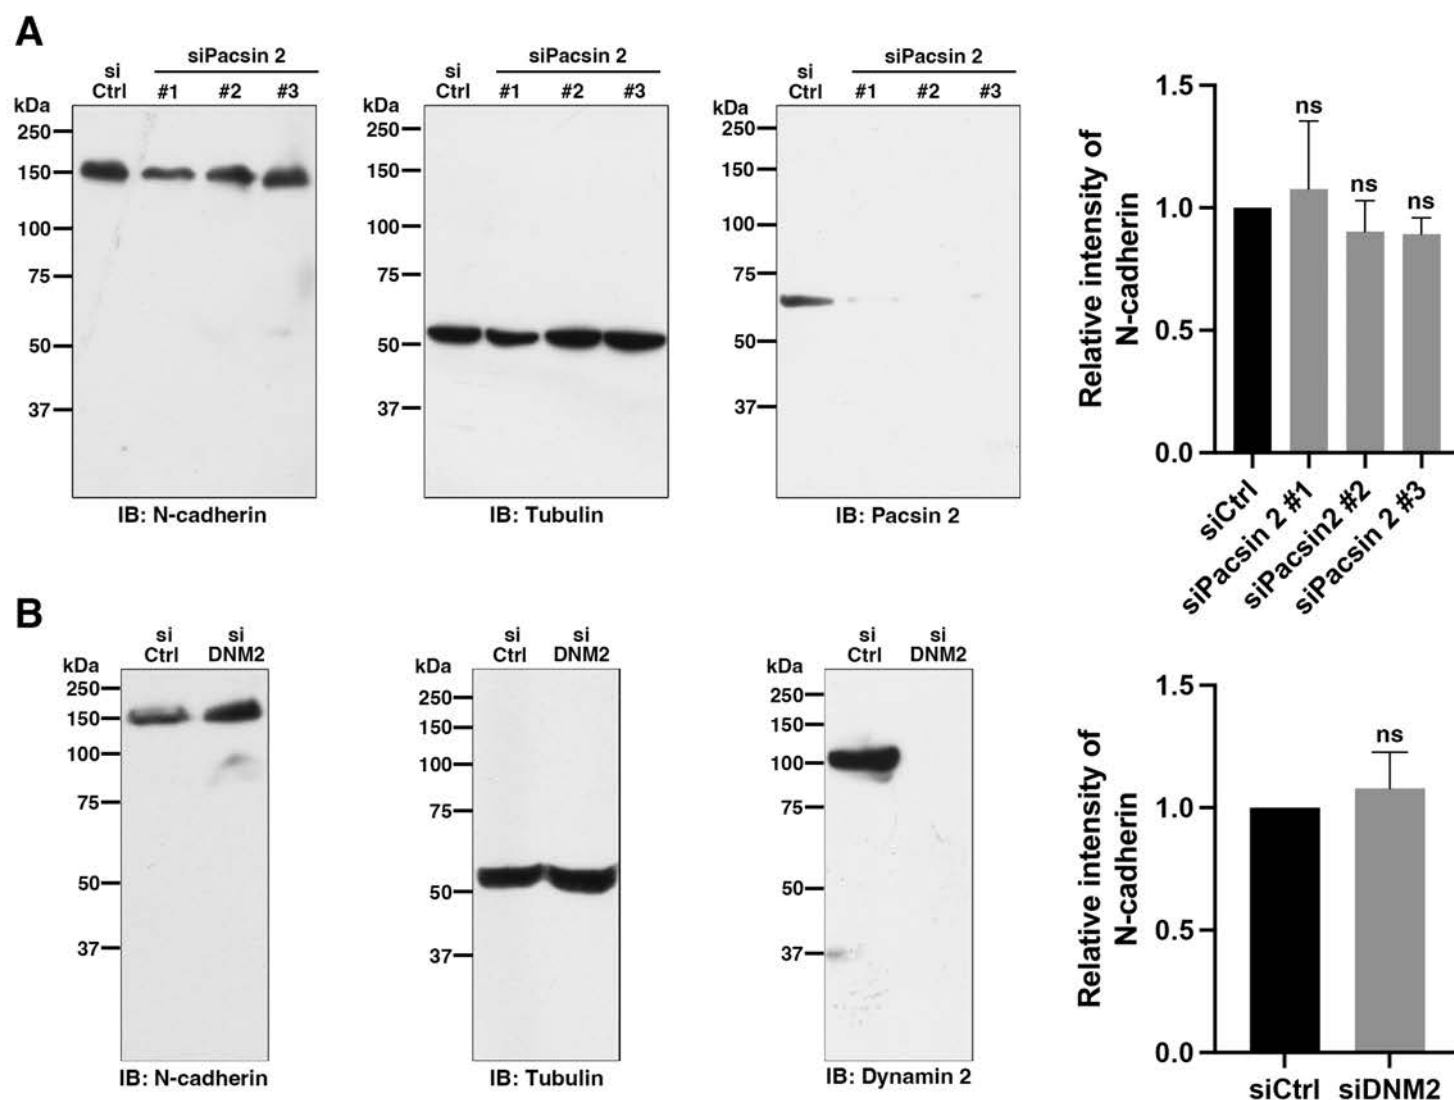

**Fig. S6. Expression level of N-cadherin in T24 cells is not affected by depletion of either pacsin 2 or dynamin 2.** (A) Immunoblot analyses of cell extract from either control RNAi cells (siCtrl) or pacsin 2 RNAi (siPacsin 2 #1, #2 and #3) cells using antibodies against N-cadherin (IB: N-cadherin), pacsin 2 (IB: Pacsin 2) or  $\alpha$ Tubulin (IB: Tubulin) as an internal control. Quantitation of N-cadherin levels relative to  $\alpha$ -tubulin in control RNAi cells (siCtrl) or pacsin 2 RNAi cells (siPacsin 2 #1, #2 and #3) are also shown. Data are means  $\pm$  SD (N=3) (B) Immunoblot analysis of cell extract from either control RNAi cells (siCtrl) or dynamin 2 RNAi (siDNM2) cells using antibodies against N-cadherin (IB: N-cadherin), dynamin 2 (IB: dynamin 2) or  $\alpha$ Tubulin (IB: Tubulin) as an internal control. Quantitation of N-cadherin levels relative to  $\alpha$ -tubulin in control RNAi (siCtrl) or dynamin 2 RNAi (siDNM2) cells are also shown. Data are means  $\pm$  SD (N=3).



**Fig.S7 Wint et al.**

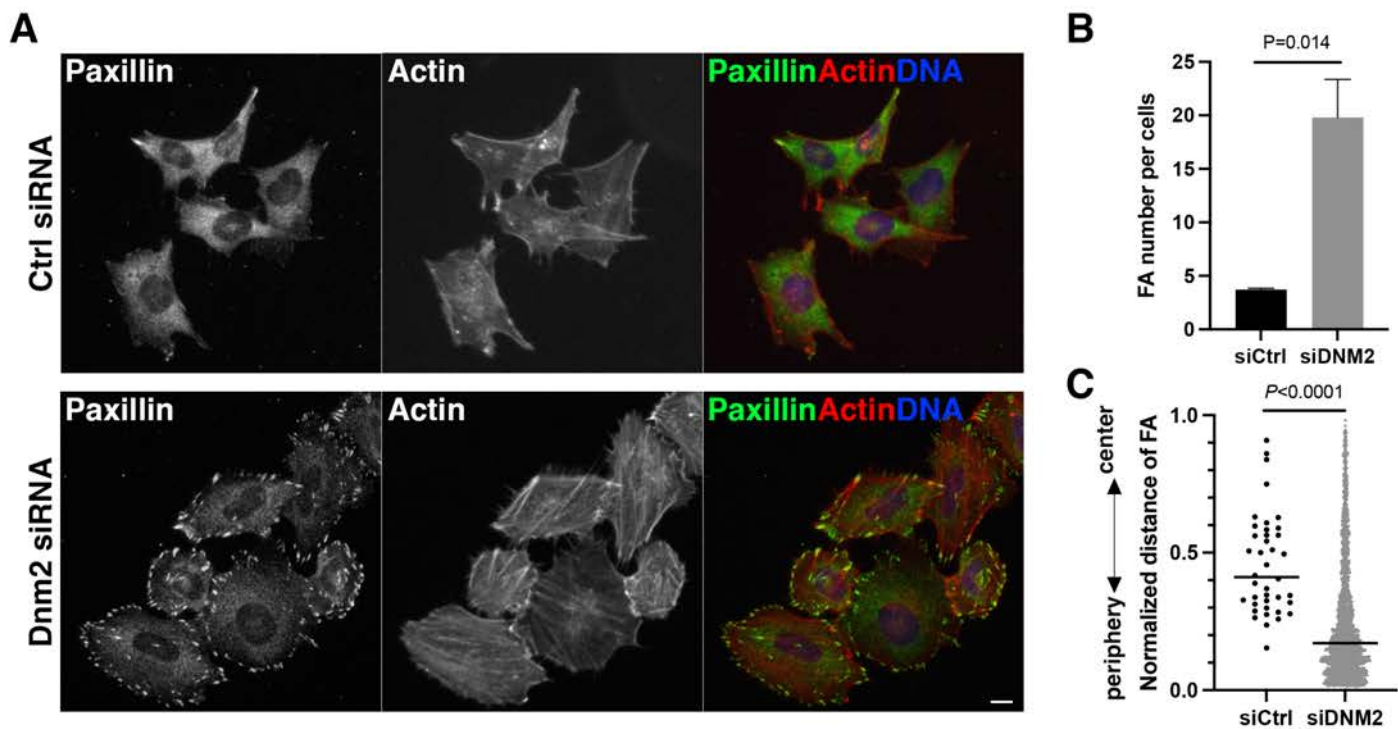

**Fig. S7. Depletion of dynamin 2 induces an elevated number of focal adhesions in T24 cells.** (A) Immunofluorescence micrographs of Paxillin (green), F-actin (red) and their merged images with DNA (blue) in control RNAi cells (siCtrl) and dynamin 2 RNAi cells (siDNM2). (B) Quantitation of focal adhesions in control RNAi cells (siCtrl) and dynamin 2 RNAi cells (siDNM2). Data are means  $\pm$  SD ( $n \geq 120$  cells,  $N=3$ ). (C) Spatial distribution of focal adhesions (FA) in either control RNAi (siCtrl) or dynamin 2 RNAi (siDNM2) cells. Normalized distance of FA between periphery (0) and centre (1) are shown (control:  $n \geq 15$  cells; siDNM2:  $n \geq 54$  cells,  $N=3$ ). The scale bar is 10  $\mu$ m.

Fig. S8 Wint et al.

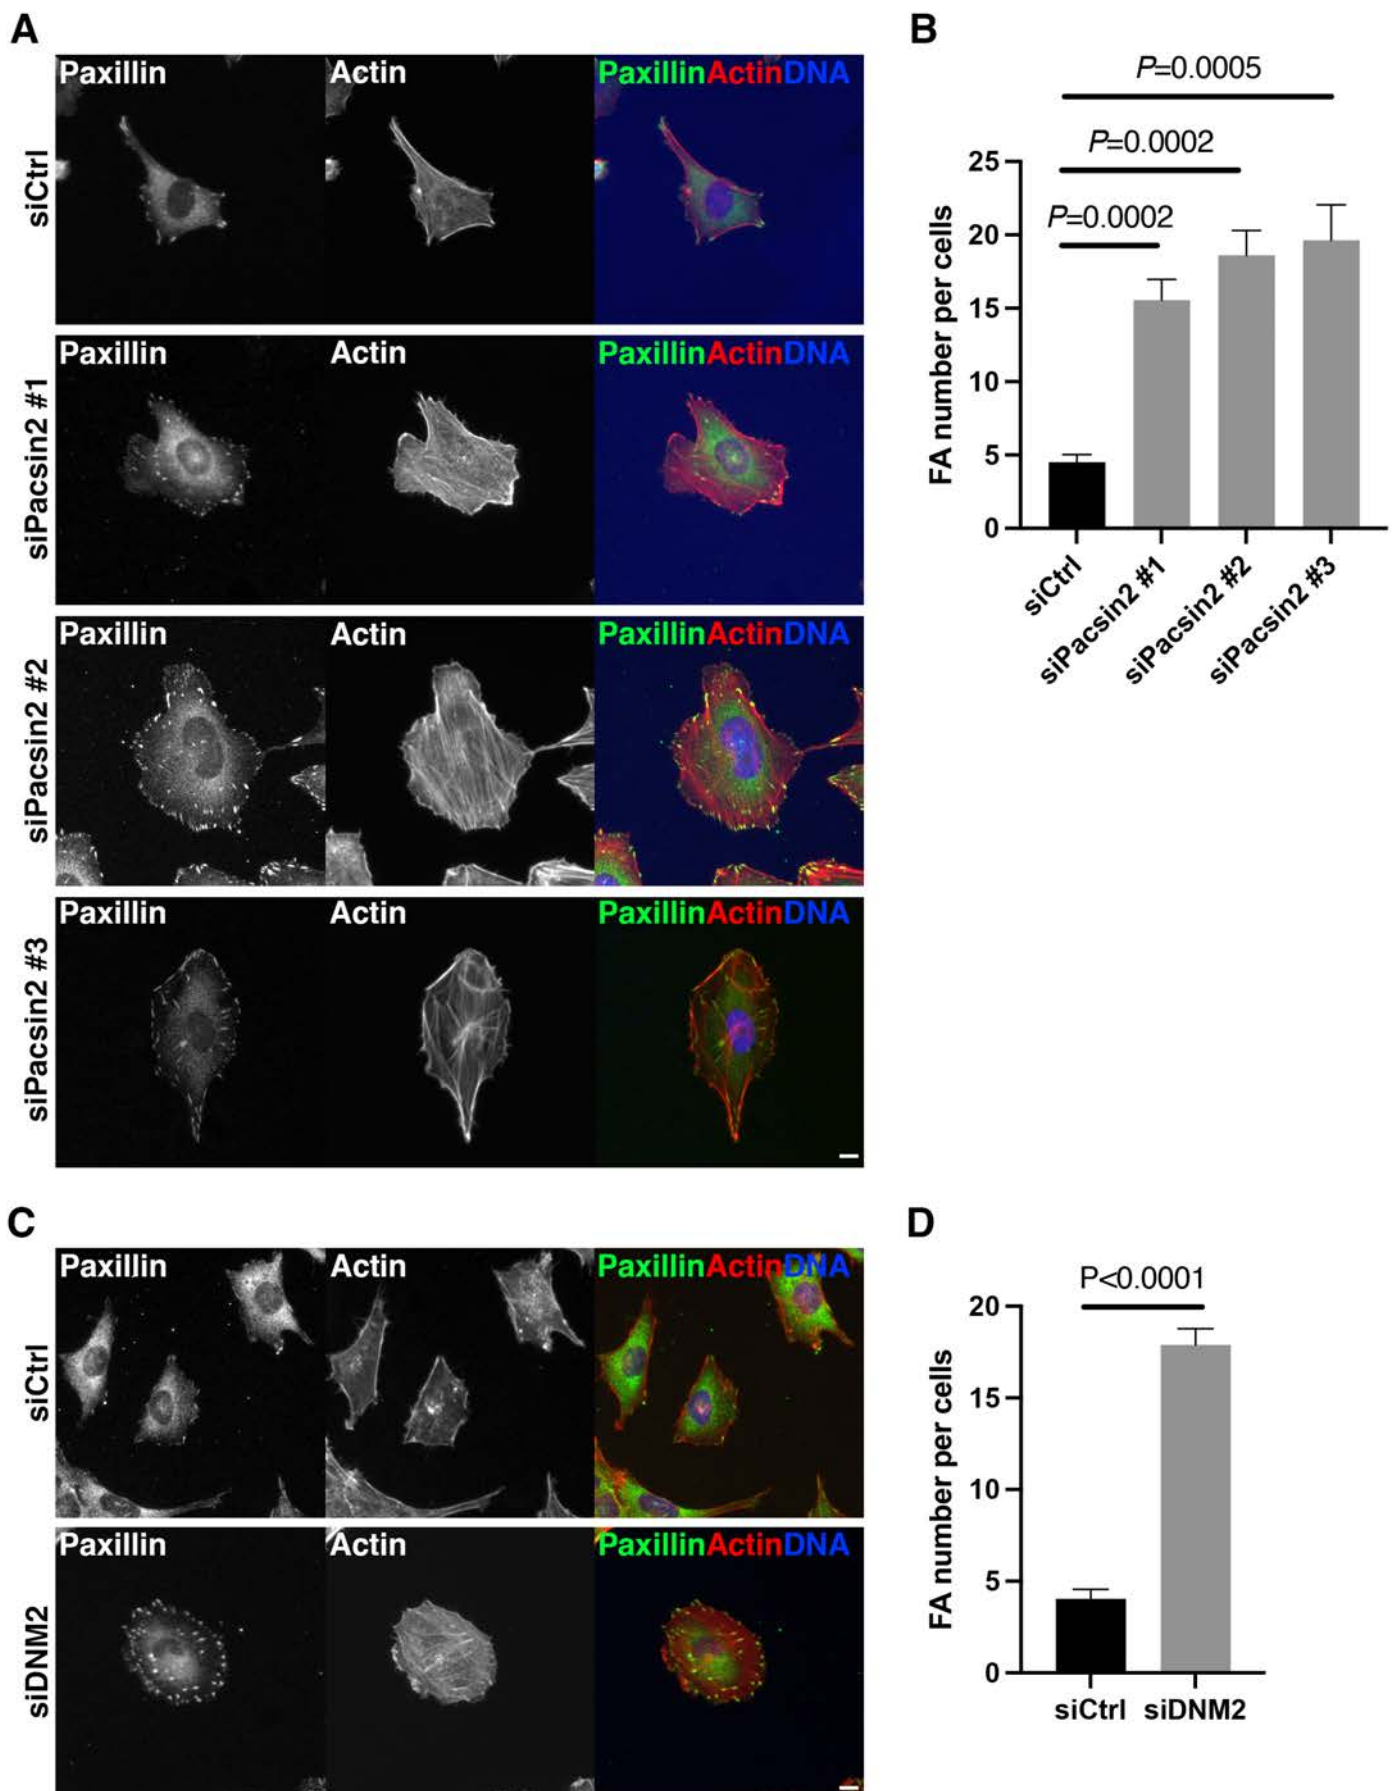

**Fig. S8. Depletion of pacsin 2 or dynamin 2 induces an elevated number of focal adhesions in single-cell conditions.** (A) Immunofluorescence micrographs of control RNAi cells (siCtrl) and pacsin 2 RNAi cells (siPacsin 2 #1, #2 and #3) stained for a focal adhesion marker paxillin (green), F-actin (red) and their merged images with DNA (blue). (B) Quantitation of focal adhesions in control RNAi cells (siCtrl) and pacsin 2 RNAi cells (siPacsin 2 #1, #2 and #3). Data are means  $\pm$  SD ( $n \geq 100$  cells,  $N=3$ ). (C) Immunofluorescence micrographs of Paxillin (green), F-actin (red) and their merged images with DNA (blue) in control RNAi cells (siCtrl) and dynamin 2 RNAi cells (siDNM2). (D) Quantitation of focal adhesions in control RNAi cells (siCtrl) and dynamin 2 RNAi cells (siDNM2). Data are means  $\pm$  SD ( $n \geq 100$  cells,  $N=3$ ).

**Table S1. Primers.**

| <b>Targets</b>                   | <b>Primers</b>                                                                                                                     |
|----------------------------------|------------------------------------------------------------------------------------------------------------------------------------|
| Pacsin 2 SH3                     | 5'-GGGG <u>ACAAGTTTGTACAAAAAAGCAGGCTGCGGGACGGAAGTGCGA</u> -3'<br>5'-GGGG <u>ACCACTTTGTACAAGAAAGCTGGGTTC</u> ACTGGATCGCCTCC-3'      |
| N-cadherin Full                  | 5'-GGGG <u>ACAAGTTTGTACAAAAAAGCAGGCTGC</u> ATGTGCCGATAGCG-3'<br>5'-GGGG <u>ACCACTTTGTACAAGAAAGCTGGGT</u> CGTCATCACCTCCACCATACAT-3' |
| N-cadherin cytoplasmic domain    | 5'- <u>CACCATGAAACGCCGGGATAAAG</u> -3'<br>5'-TCAGTCATCACCTCCACC-3'                                                                 |
| N-cadherin mutants P818/P821A    | 5'-GATCGGACCGCATACTGGGCCTCAGCGTGG-3'<br>5'-CCACGCTGAGGCCAGTATGCGGTCCGATC-3'                                                        |
| N-cadherin mutants P847/850/851A | 5'-AGGGAGTCATATGCTGCAGCTGTGGCGTCATTGTCAGCC-3'<br>5'-GGCTGACAATGACGCCACAGCTGCAGCATATGACTCCCT-3'                                     |

\*Underlined sequences are for BP recombination (Pacsin 2 SH3 and N-cadherin Full) and Blunt TOPO PCR cloning (N-cadherin cytoplasmic domain).



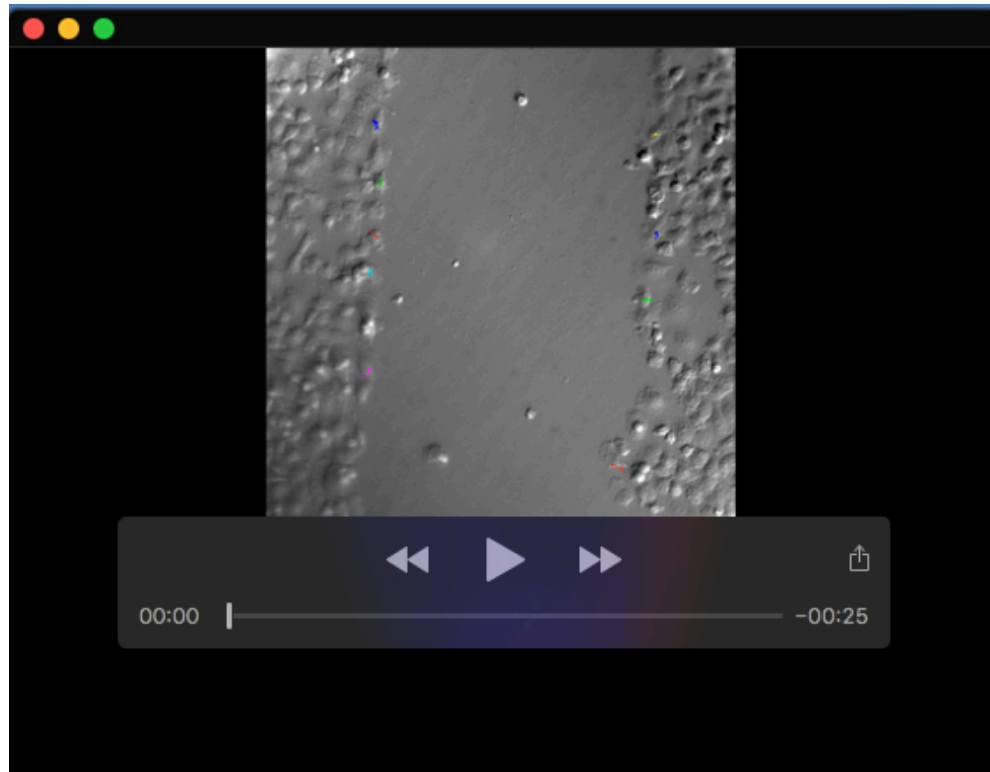

**Movie 1. Control RNAi cells in the wound healing assay.** Images were obtained every 1min for 6 hours after the start of the wound healing assay. Trajectories of the ten representing cells are shown in different colours.

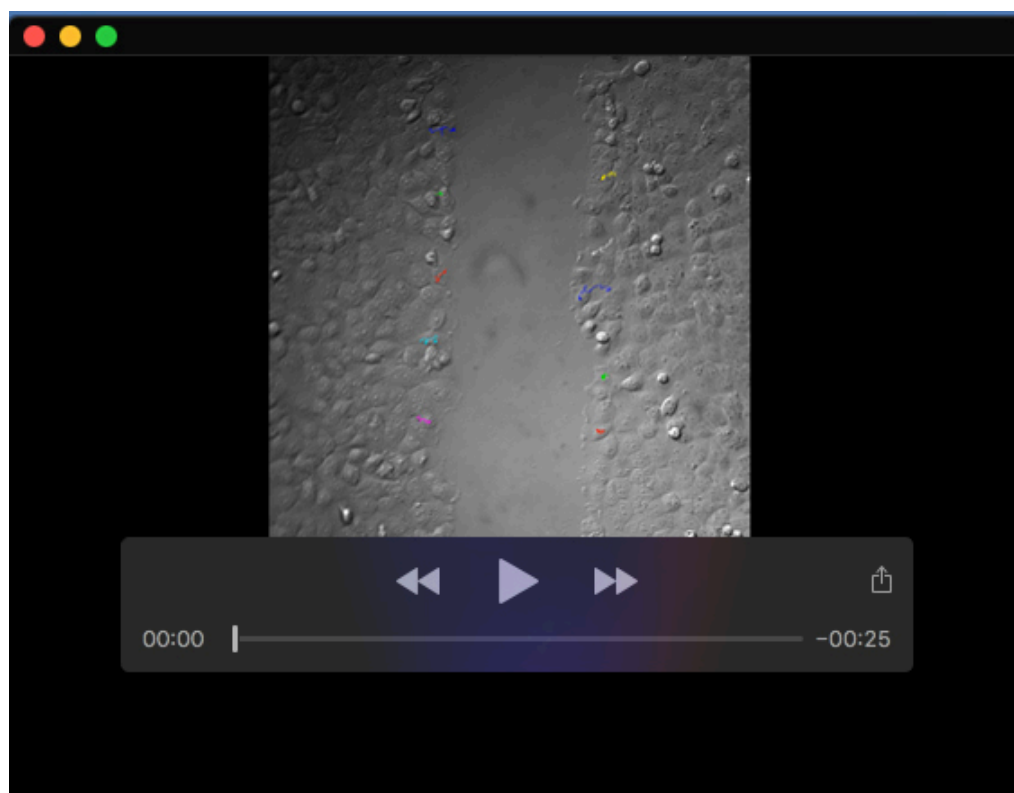

**Movie 2. Pacsin 2 RNAi cells in the wound healing assay.** Images were obtained every 1min for 6 hours after the start of the wound healing assay. Trajectories of the ten representing cells are shown in different colours.
